# Supplementary material for: Temporal binding and sense of agency in major depression
Source: Frontiers journal article supplement (doi:10.3389/fpsyt.2024.1288674), 2024-04-05
Supplement: Data_Sheet_1.PDF [file Data_Sheet_1.PDF]

## Supplement

**Tables S1:** Results after Z-scoring time estimates. Z-Scoring did not change the statistical results.

**Table S1.1:** Results across both groups after Z-scoring.

|                                          | F        | Num df | Den df | p     |
|------------------------------------------|----------|--------|--------|-------|
| Agency                                   | 1.848    | 1      | 9616.0 | 0.174 |
| Stimulus                                 | 759.781  | 1      | 9616.0 | <.001 |
| Interval                                 | 1199.380 | 2      | 9616.0 | <.001 |
| Diagnosis                                | 3.849    | 1      | 79.0   | 0.053 |
| Agency * Stimulus                        | 31.735   | 1      | 9616.0 | <.001 |
| Agency * Interval                        | 16.662   | 2      | 9616.0 | <.001 |
| Stimulus * Interval                      | 38.901   | 2      | 9616.0 | <.001 |
| Agency * Diagnosis                       | 55.724   | 1      | 9616.0 | <.001 |
| Stimulus * Diagnosis                     | 6.045    | 1      | 9616.0 | 0.014 |
| Interval * Diagnosis                     | 0.102    | 2      | 9616.0 | 0.903 |
| Agency * Stimulus * Interval             | 6.693    | 2      | 9616.0 | 0.001 |
| Agency * Stimulus * Diagnosis            | 4.075    | 1      | 9616.0 | 0.044 |
| Agency * Interval * Diagnosis            | 0.159    | 2      | 9616.0 | 0.853 |
| Stimulus * Interval * Diagnosis          | 0.622    | 2      | 9616.0 | 0.537 |
| Agency * Stimulus * Interval * Diagnosis | 0.210    | 2      | 9616.0 | 0.810 |

*Note.* Satterthwaite method for degrees of freedom

**Table S1.2:** Results for the CG group after Z-scoring.

|                              | <b>F</b> | <b>Num df</b> | <b>Den df</b> | <b>p</b> |
|------------------------------|----------|---------------|---------------|----------|
| Agency                       | 21.85    | 1             | 4987          | <.001    |
| Stimulus                     | 527.62   | 1             | 4987          | <.001    |
| Interval                     | 714.28   | 2             | 4987          | <.001    |
| Agency * Stimulus            | 34.28    | 1             | 4987          | <.001    |
| Agency * Interval            | 11.70    | 2             | 4987          | <.001    |
| Stimulus * Interval          | 26.57    | 2             | 4987          | <.001    |
| Agency * Stimulus * Interval | 3.81     | 2             | 4987          | 0.022    |

*Note.* Satterthwaite method for degrees of freedom

**Table S1.3:** Results for comparisons of visual stimuli between groups after Z-scoring.

|                               | <b>F</b> | <b>Num df</b> | <b>Den df</b> | <b>p</b> |
|-------------------------------|----------|---------------|---------------|----------|
| Agency                        | 28.947   | 1             | 4769.0        | <.001    |
| Interval                      | 499.269  | 2             | 4769.0        | <.001    |
| Diagnosis                     | 5.318    | 1             | 79.0          | 0.024    |
| Agency * Interval             | 3.209    | 2             | 4769.0        | 0.040    |
| Agency * Diagnosis            | 17.563   | 1             | 4769.0        | <.001    |
| Interval * Diagnosis          | 0.133    | 2             | 4769.0        | 0.875    |
| Agency * Interval * Diagnosis | 0.397    | 2             | 4769.0        | 0.673    |

*Note.* Satterthwaite method for degrees of freedom

**Table S1.4:** Results for comparisons of auditory stimuli between groups after Z-scoring.

|                               | <b>F</b> | <b>Num df</b> | <b>Den df</b> | <b>p</b> |
|-------------------------------|----------|---------------|---------------|----------|
| Agency                        | 8.6752   | 1             | 4768.0        | 0.003    |
| Interval                      | 775.8995 | 2             | 4768.0        | <.001    |
| Diagnosis                     | 2.2780   | 1             | 79.0          | 0.135    |
| Agency * Interval             | 19.6142  | 2             | 4768.0        | <.001    |
| Agency * Diagnosis            | 42.7314  | 1             | 4768.0        | <.001    |
| Interval * Diagnosis          | 0.5810   | 2             | 4768.0        | 0.559    |
| Agency * Interval * Diagnosis | 0.0331   | 2             | 4768.0        | 0.967    |

*Note.* Satterthwaite method for degrees of freedom

**Tables S2:** Results for comparisons between questionnaire scores and SoAS sub scales (positive and negative SoA)

**Tables S2.1:** Results from linear regression model between positive SoA and BDI.

## Linear Regression

Model Fit Measures

| Model | R     | R <sup>2</sup> |
|-------|-------|----------------|
| 1     | 0.535 | 0.286          |

Model Coefficients - SoAS-positive

| Predictor | Estimate | SE     | t     | p     |
|-----------|----------|--------|-------|-------|
| Intercept | 35.120   | 0.9586 | 36.64 | <.001 |
| BDI       | -0.282   | 0.0505 | -5.59 | <.001 |

**Tables S2.2:** Results from linear regression model between negative SoA and BDI.

## Linear Regression

Model Fit Measures

| Model | R     | R <sup>2</sup> |
|-------|-------|----------------|
| 1     | 0.515 | 0.265          |

Model Coefficients - SoAS-negative

| Predictor | Estimate | SE     | t     | p     |
|-----------|----------|--------|-------|-------|
| Intercept | 11.231   | 1.0102 | 11.12 | <.001 |
| BDI       | 0.282    | 0.0532 | 5.31  | <.001 |

**Tables S2.3:** Results from linear regression model between positive SoA and GSE.

## Linear Regression

Model Fit Measures

| Model | R     | R <sup>2</sup> |
|-------|-------|----------------|
| 1     | 0.652 | 0.425          |

Model Coefficients - SoAS-positive

| Predictor | Estimate | SE     | t    | p     |
|-----------|----------|--------|------|-------|
| Intercept | 16.035   | 2.0849 | 7.69 | <.001 |
| GSE       | 0.578    | 0.0761 | 7.59 | <.001 |

**Tables S2.4:** Results from linear regression model between negative SoA and GSE.

## Linear Regression

Model Fit Measures

| Model | R     | R <sup>2</sup> |
|-------|-------|----------------|
| 1     | 0.546 | 0.298          |

Model Coefficients - SoAS-negative

| Predictor | Estimate | SE     | t     | p     |
|-----------|----------|--------|-------|-------|
| Intercept | 28.346   | 2.3915 | 11.85 | <.001 |
| GSE       | -0.503   | 0.0873 | -5.76 | <.001 |

**Tables S2.5:** Results from linear regression model between positive SoA and BDI for the MDD group.

## Linear Regression

Model Fit Measures

| Model | R     | R <sup>2</sup> |
|-------|-------|----------------|
| 1     | 0.372 | 0.139          |

Model Coefficients - SoAS-positive

| Predictor | Estimate | SE     | t     | p     |
|-----------|----------|--------|-------|-------|
| Intercept | 33.876   | 2.5868 | 13.10 | <.001 |
| BDI       | -0.236   | 0.0966 | -2.44 | 0.020 |

**Tables S2.6:** Results from linear regression model between negative SoA and BDI for the MDD group.

## Linear Regression

Model Fit Measures

| Model | R     | R <sup>2</sup> |
|-------|-------|----------------|
| 1     | 0.340 | 0.115          |

Model Coefficients - SoAS-negative

| Predictor | Estimate | SE    | t    | p     |
|-----------|----------|-------|------|-------|
| Intercept | 12.598   | 2.856 | 4.41 | <.001 |
| BDI       | 0.234    | 0.107 | 2.20 | 0.034 |

**Tables S2.7:** Results from linear regression model between positive SoA and GSE for the MDD group.

Linear Regression

| Model Fit Measures |       |                |
|--------------------|-------|----------------|
| Model              | R     | R <sup>2</sup> |
| 1                  | 0.572 | 0.328          |

>

| Model Coefficients - SoAS-positive |          |       |      |       |
|------------------------------------|----------|-------|------|-------|
| Predictor                          | Estimate | SE    | t    | p     |
| Intercept                          | 14.456   | 3.356 | 4.31 | <.001 |
| GSE                                | 0.677    | 0.159 | 4.25 | <.001 |

**Tables S2.7:** Results from linear regression model between negative SoA and GSE for the MDD group.

Linear Regression

| Model Fit Measures |       |                |
|--------------------|-------|----------------|
| Model              | R     | R <sup>2</sup> |
| 1                  | 0.331 | 0.110          |

| Model Coefficients - SoAS-negative |          |       |       |       |
|------------------------------------|----------|-------|-------|-------|
| Predictor                          | Estimate | SE    | t     | p     |
| Intercept                          | 26.930   | 4.206 | 6.40  | <.001 |
| GSE                                | -0.427   | 0.200 | -2.14 | 0.039 |
